# Supplementary material for: An mHealth Intervention Using a Smartphone App to Increase Walking Behavior in Young Adults: A Pilot Study
Source: PubMed Central journal article supplement (PMC5054234; doi:10.2196/mhealth.5227), 2016-09-22
Supplement: mhealth_v4i3e109_app1.pdf [file mhealth_v4i3e109_app1.pdf]

Multimedia Appendix 1. Information on methodology.

---

|                                                          |                                                                                                                                                                                                                                                                                                                                                                  |                                                                                                                                                                                                                                                                                       |
|----------------------------------------------------------|------------------------------------------------------------------------------------------------------------------------------------------------------------------------------------------------------------------------------------------------------------------------------------------------------------------------------------------------------------------|---------------------------------------------------------------------------------------------------------------------------------------------------------------------------------------------------------------------------------------------------------------------------------------|
| Ethical approval obtained.                               |                                                                                                                                                                                                                                                                                                                                                                  |                                                                                                                                                                                                                                                                                       |
| Participants recruited                                   |                                                                                                                                                                                                                                                                                                                                                                  |                                                                                                                                                                                                                                                                                       |
| Screened by the research team for inclusion suitability. | <p>Inclusion criteria:</p> <p>Students in the university</p> <p>Active smartphone users</p> <p>&gt;16 years of age</p>                                                                                                                                                                                                                                           | <p>Exclusion criteria:</p> <p>Acute psychiatric illness / unable to undertake moderate exercise</p> <p>Pregnancy</p> <p>Not an owner of a suitable smartphone</p>                                                                                                                     |
| Baseline screening meeting:                              | Participants given study information, signed consent, and smartphone application (app), Accupedo-Pro Pedometer, was downloaded to smartphones step-count display not made visible.                                                                                                                                                                               |                                                                                                                                                                                                                                                                                       |
| Week 1:                                                  | All participants continued normal activity level; carried smartphone during all waking hours so the app could record baseline step count while remaining invisible to the participant.                                                                                                                                                                           |                                                                                                                                                                                                                                                                                       |
| End of week 1:                                           | Randomization code broken; participants assigned to control or intervention groups.                                                                                                                                                                                                                                                                              |                                                                                                                                                                                                                                                                                       |
|                                                          | <p><i>Intervention group:</i></p> <p>App and step count made visible</p> <p>Given information on benefits of exercise</p> <p>Instructed to increase physical activity (goal of 10 000 steps per day); Encouraged to use app to achieve goal</p>                                                                                                                  | <p><i>Control group:</i></p> <p>App with step count continues to remain invisible</p> <p>Given information on benefits of exercise</p> <p>Instructed to increase physical activity with a goal of an additional 30 minutes' walking exercise (equivalent to 10 000 steps) per day</p> |
| BCTs used in each study arm                              | <p>1.3 Goal setting (outcome)</p> <p>1.6 discrepancy between current behavior and goal</p> <p>2.2 feedback on behavior</p> <p>2.3 Self-monitoring of behavior</p> <p>4.1 Instruction on how to perform a behavior</p> <p>5.1 Information about health consequences</p> <p>6.1 Demonstration of the behavior</p> <p>5.1 Information about health consequences</p> | <p>1.3 Goal setting (outcome)</p> <p>2.3 Self-monitoring of behavior</p> <p>4.1 Instruction on how to perform a behavior</p> <p>5.1 Information about health consequences</p> <p>6.1 Demonstration of the behavior</p>                                                                |

COM-B model  
targets of intervention

Psychological capability

Psychological capability  
Reflective Motivation

Intervention  
Functions identified  
using the Theoretical  
Domains Framework

Education

Education  
Training  
Modelling

After completion of  
5-week trial:  
Quantitative results  
analyzed with SPSS  
for outcome

Stepcount for all participants recorded; After trial completion,  
all control-group participants shown how to use the app.  
mean difference in daily step count between baseline and 8-  
week follow up

---

SPSS = Statistical Package for the Social Sciences.
